# Supplementary material for: Supramolecular self-assembly structures and properties of zwitterionic squaraine molecules
Source: Royal Society of Chemistry journal article supplement (doi:10.1039/c3ra40690c), 2013-01-01
Supplement: c3ra40690c.pdf [file c3ra40690c.pdf]

## Supporting Information for:

### Supramolecular self-assembly structures and properties of zwitterionic squaraine molecules

Zhengquan Yan,<sup>a,b</sup> Shanyi Guang,<sup>a</sup> Hongyao Xu,<sup>a\*</sup> Xinyan Su,<sup>a</sup> Xiaoli Ji,<sup>a</sup> and Xiangyang Liu<sup>a</sup>

<sup>a</sup>College of Material Science and Engineering & State Key Laboratory of Chemical Fibers and Polymeric Materials, Donghua University, Shanghai 201620, China. Tel: +86-021-67792874.

E-mail: hongyaoxu@163.com (H,Xu)

<sup>b</sup> Anhui Provincial Laboratory of Biomimetic Sensor and Detecting Technology & Department of Material and Chemical Industry, West Anhui University, Lu'an 237012, China.

E-mail: yzhq2008z@yahoo.com.cn

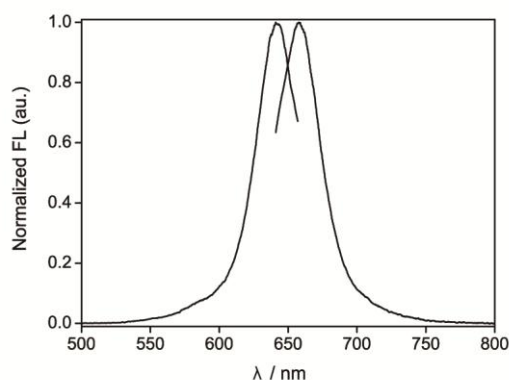

Figure S1. The excitation (left) and emission spectra (right) of **2a**

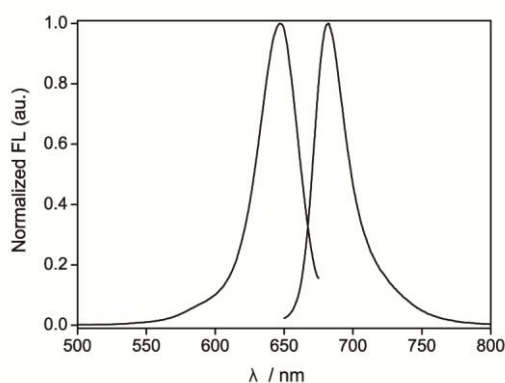

Figure S2. The excitation (left) and emission spectra (right) of **2b**

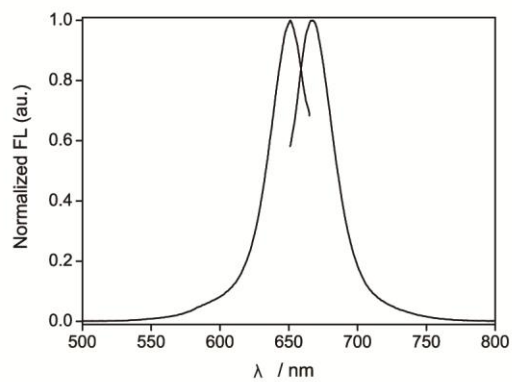

Figure S3. The excitation (left) and emission spectra (right) of **2c**
